# Supplementary material for: Bone marrow-derived mesenchymal stem cells improve diabetes-induced cognitive impairment by exosome transfer into damaged neurons and astrocytes
Source: PubMed Central journal article supplement (PMC4840335; doi:10.1038/srep24805), 2016-04-22
Supplement: srep24805-s1.pdf [file srep24805-s1.pdf]

## **Supplementary information**

1. Supplementary Figure
2. Methods
3. References

Bone marrow-derived mesenchymal stem cells improve diabetes-induced cognitive impairment by exosome transfer into damaged neurons and astrocytes.

Masako Nakano, Kanna Nagaishi, Naoto Konari, Yuki Saito, Takako Chikenji, Yuka Mizue, Mineko Fujimiya

## Supplementary Figure 1

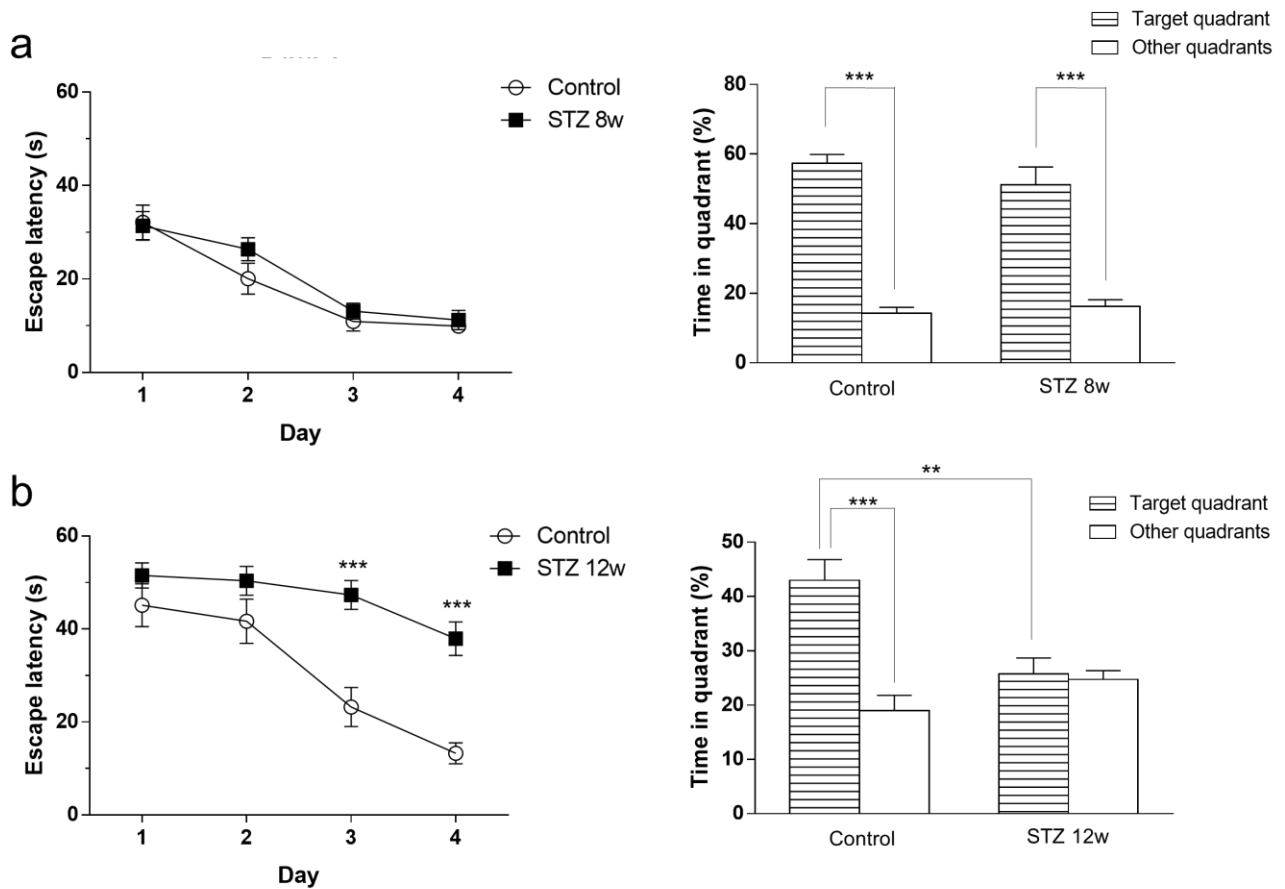

(a) MWM test conducted at 8 weeks after STZ injection. In the hidden training test, no difference is found in escape latency between Control and STZ 8w mice. Two-way ANOVA ( $F(1,66) = 1.094$ ,  $P = 0.2994$ ). Values are means  $\pm$  s.e.m,  $n = 8-9$ . In the probe test, no difference is found in the target quadrant occupancy between Control and STZ 8w mice ( $P = 0.3127$ , unpaired two-tailed  $t$ -tests). Control and STZ 8w mice spend significantly more time in the target quadrant than any of the other quadrants ( $***P < 0.001$ , unpaired two-tailed  $t$ -tests). Values are means  $\pm$  s.e.m.  $n = 8-9$ . (b) MWM test conducted at 12 weeks after STZ injection. In the hidden training test, STZ 12w mice exhibit longer escape latency on days 3 and 4 than control mice.  $***P < 0.001$ , STZ 12w vs. control;

two-way ANOVA ( $F(1,50) = 27.4$   $P < 0.0001$ ). Values are means  $\pm$  s.e.m,  $n = 5-8$ . In the probe test, the target quadrant occupancy of STZ12w mice is significantly reduced compared with control mice ( $**P < 0.01$ , unpaired two-tailed  $t$ -tests). Control mice spend significantly more time in the target quadrant than any of the other quadrants ( $***P < 0.001$ , unpaired two-tailed  $t$ -tests). For STZ 12w mice, the time spent in the target quadrant is similar to that spent in the other quadrants ( $P = 0.7511$ , unpaired two-tailed  $t$ -tests). Values are means  $\pm$  s.e.m.  $n = 5-8$ .

## Supplementary Figure 2

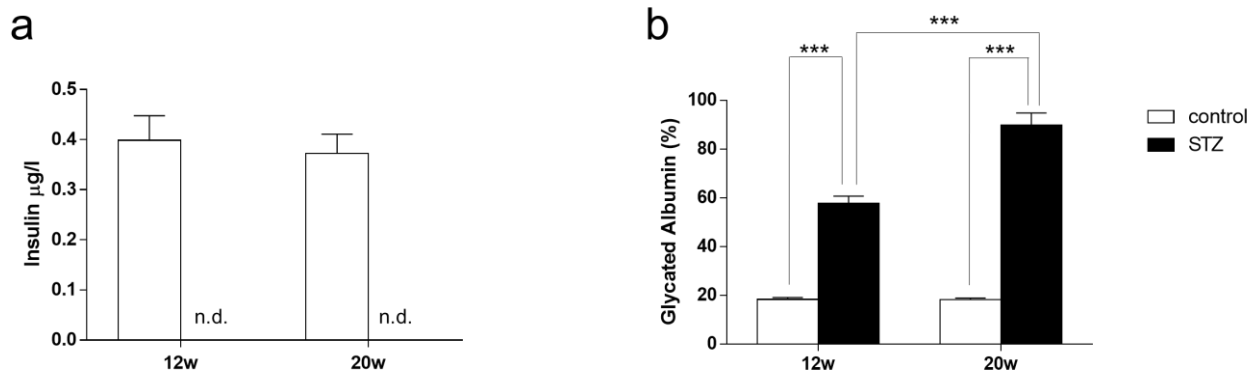

(a) Serum insulin levels at 12 and 20 weeks after STZ injection. Insulin is not detected in STZ mice.

Values are means  $\pm$  s.e.m,  $n = 6$ . (b) Glycated albumin levels at 12 and 20 weeks after STZ injection.

Significant increase of glycated albumin level is found in STZ mice compared to controls ( $***P < 0.001$ , unpaired two-tailed  $t$ -tests).

Glycated albumin levels at 20 weeks after STZ injection were

significant increased compared to those of STZ 12 weeks mice ( $***P < 0.001$ , unpaired two-tailed

$t$ -tests). Values are means  $\pm$  s.e.m,  $n = 6$ .

### Supplementary Figure 3

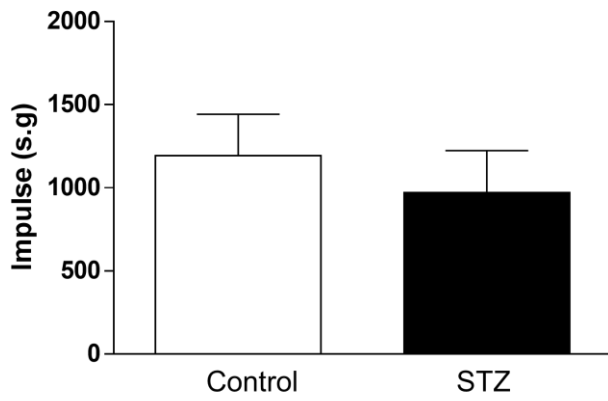

Hanging wire test. No difference is found between STZ and control mice ( $P = 0.556$ , unpaired two-tailed  $t$ -tests). Values are means  $\pm$  s.e.m,  $n = 4-5$ .

## Supplementary Figure 4

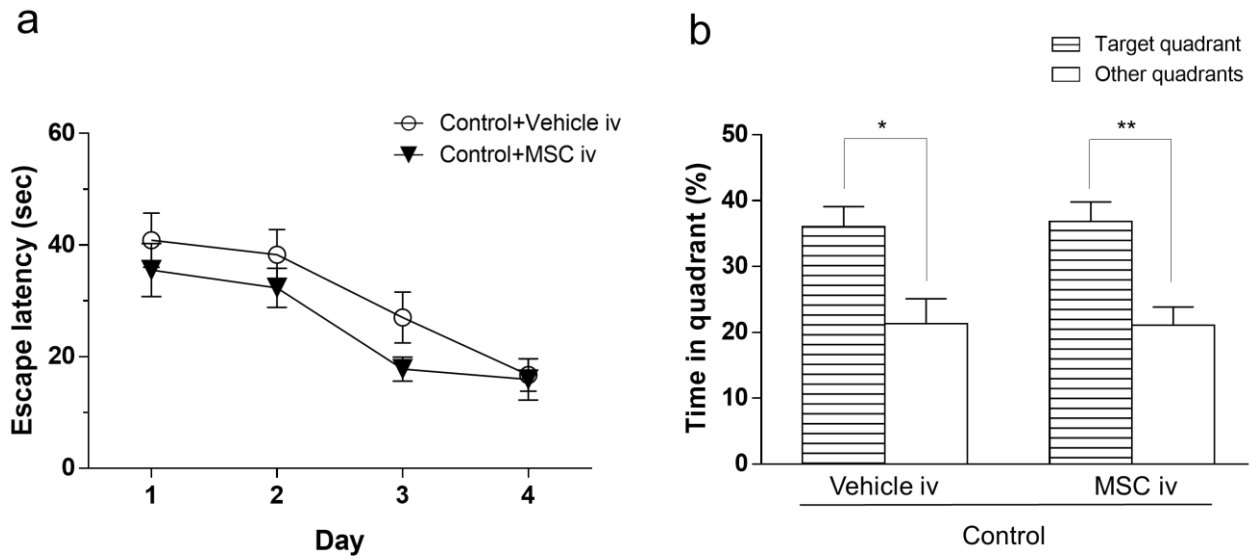

(a) MWM test. In the hidden training test, no difference is found in escape latency between control + vehicle and control + MSC mice. Two-way ANOVA ( $F(1,42) = 3.2$ ,  $P = 0.0809$ ). Values are means  $\pm$  s.e.m,  $n = 5-6$ . (b) In the probe test, no difference is found in the target quadrant occupancy between control + vehicle and control + MSC mice ( $P = 0.8541$ , unpaired two-tailed  $t$ -tests). Control + vehicle and control + MSC mice spend significantly more time in the target quadrant than any of the other quadrants ( $*P < 0.05$ ,  $**P < 0.01$ , unpaired two-tailed  $t$ -tests). Values are means  $\pm$  s.e.m.  $n = 5-6$ .

## Supplementary Figure 5

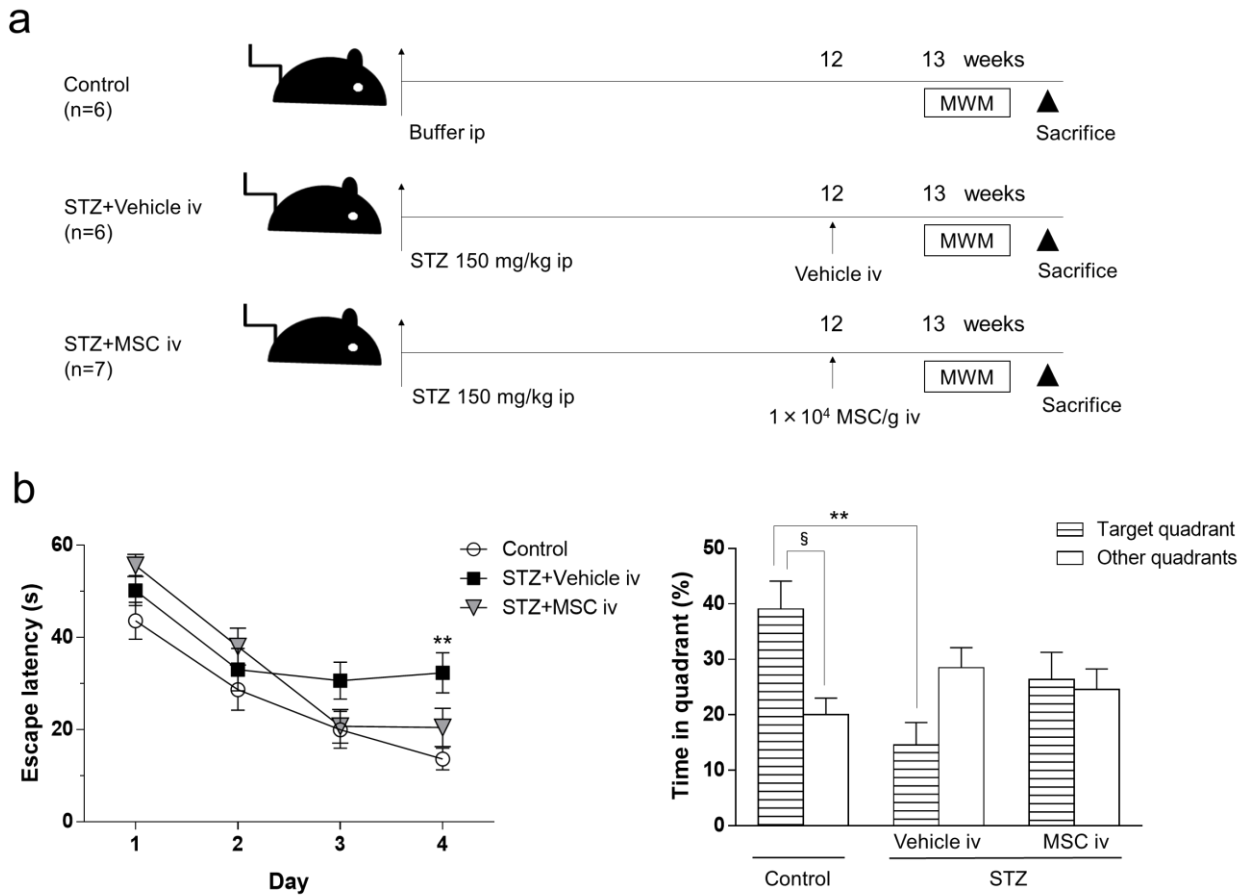

Intravenous injection of BM-MSCs into STZ-induced diabetic mice. **(a)** Experimental protocol. At 12 weeks after STZ injection, mice are injected iv with  $1 \times 10^4$  MSCs/g body weight 1 times or with PBS for vehicle injection. 1 week after the injection, the MWM test is carried out. **(b)** MWM test. In the hidden training test, STZ + vehicle mice exhibit longer escape latency on days 4 than control mice. On the other hand, no difference is found in escape latency between STZ + vehicle and STZ + MSC mice.  $**P < 0.01$ , STZ + vehicle vs. control, two-way ANOVA ( $F(2,73) = 7.173$   $P = 0.0014$ ). Values are means  $\pm$  s.e.m,  $n = 6-7$ . In the probe test, the target quadrant occupancy of STZ + vehicle mice is significantly reduced compared with control mice ( $**P < 0.01$ , one-way ANOVA,

Bonferroni post-test). On the other hand, no difference is found in the target quadrant occupancy between STZ + vehicle and STZ + MSC mice. Control mice spend significantly more time in the target quadrant than any of the other quadrants ( $P < 0.01$ , unpaired two-tailed  $t$ -tests). For STZ + vehicle and STZ + MSC mice, the time spent in the target quadrant is similar to that spent in the other quadrants ( $P > 0.05$ , unpaired two-tailed  $t$ -tests). Swimming speed is similar among the 3 groups (control =  $0.1503 \pm 0.0068 \text{ m s}^{-1}$ , STZ + vehicle =  $0.1415 \pm 0.0068 \text{ m s}^{-1}$ , STZ + MSC =  $0.1573 \pm 0.0091 \text{ m s}^{-1}$ ;  $P > 0.05$ , one-way ANOVA). Values are means  $\pm$  s.e.m.  $n = 6-7$ .



## Supplementary Figure 6

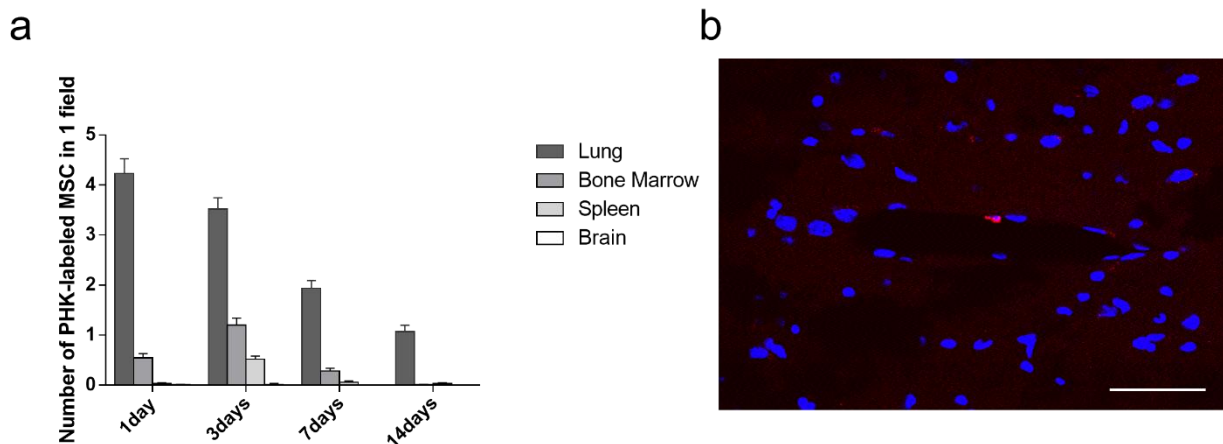

**(a)** Distribution of BM-MSCs in different organs. At 1 day after injection, PKH-labeled BM-MSCs are detected in the lung ( $4.23 \pm 0.30$  cells per 1 visual field), bone marrow ( $0.54 \pm 0.09$ ), spleen ( $0.03 \pm 0.02$ ), and brain ( $0.01 \pm 0.01$ ). At 3 days after injection, they are detected in the lung ( $3.52 \pm 0.22$ ), bone marrow ( $1.2 \pm 0.14$ ), spleen ( $0.52 \pm 0.06$ ), and brain ( $0.02 \pm 0.01$ ). At 7 days after injection, they are detected in the lung ( $1.93 \pm 0.16$ ), bone marrow ( $0.28 \pm 0.06$ ), and spleen ( $0.06 \pm 0.02$ ), but not in the brain. At 14 days after injection, they are detected in the lung ( $1.07 \pm 0.13$ ), bone marrow ( $0.01 \pm 0.01$ ), and spleen ( $0.03 \pm 0.02$ ), but not in the brain ( $0.00 \pm 0.00$ ). Values are means  $\pm$  s.e.m.

**(b)** Distribution of BM-MSCs in brain. Very few PKH-labeled BM-MSCs are observed at perivascular areas in the brain at 3 days after injection. Bar, 50  $\mu$ m.

Supplementary Figure 7

a

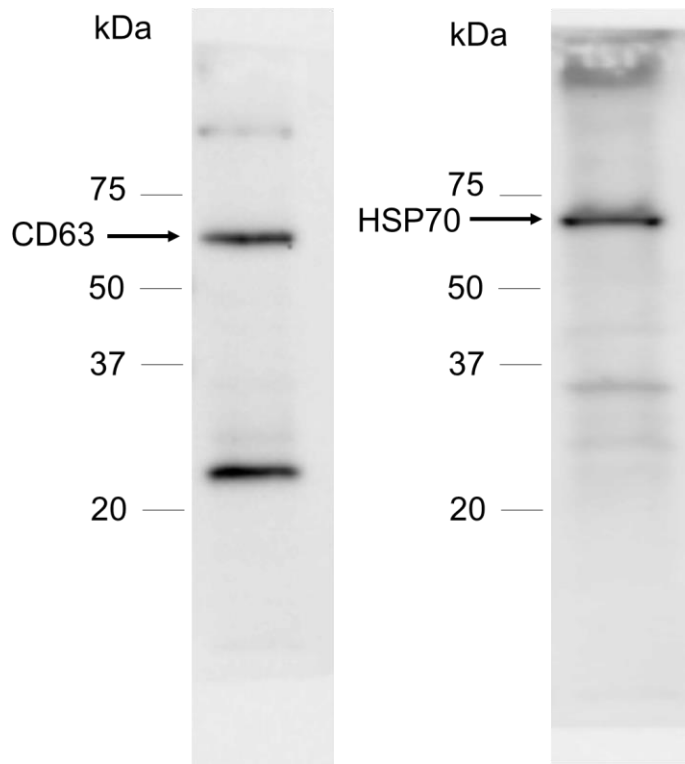

b

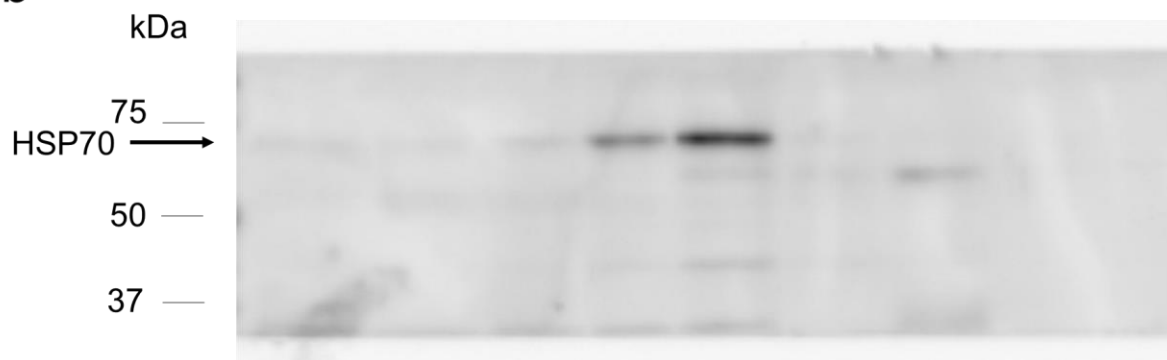

(a) The full-length blots in Figure 2a.

(b) The full-length blots in Figure 2b.

# Supplementary Figure 8

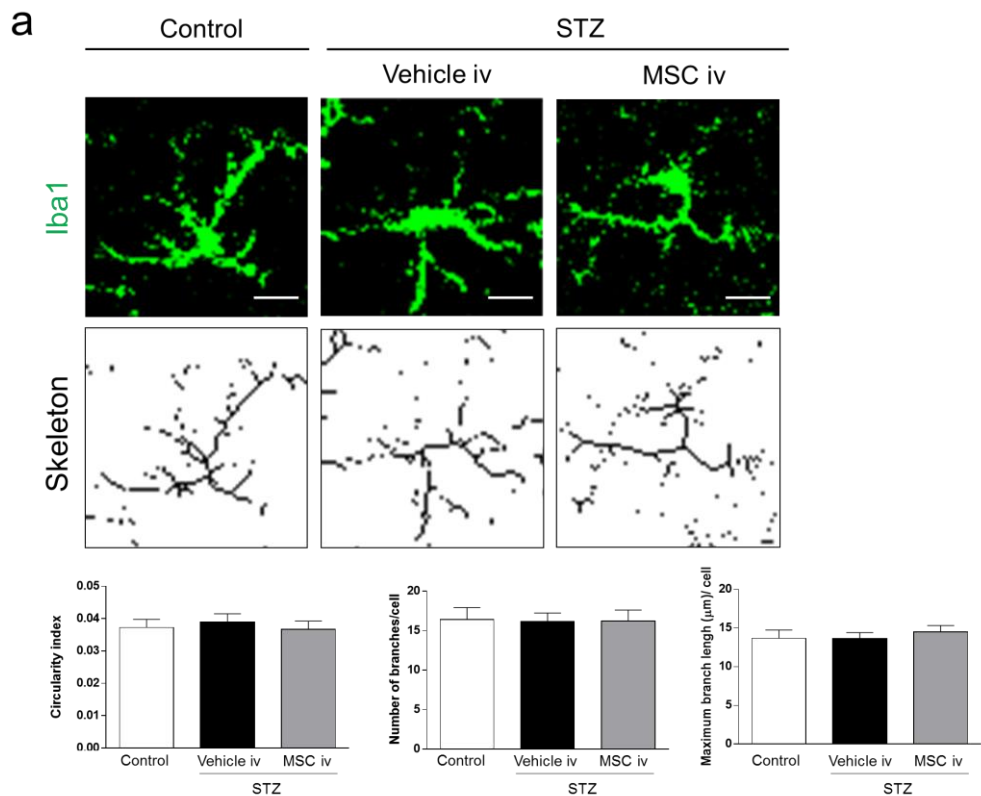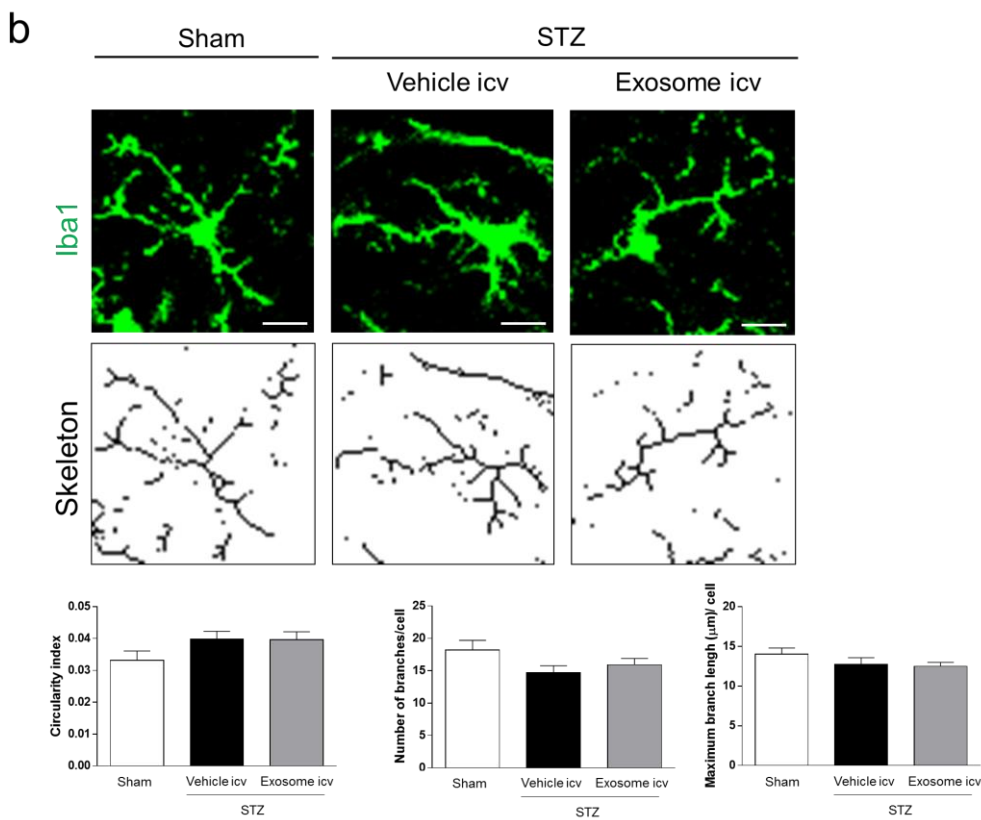

**(a)** Circularity, number of branches and maximum branch length of microglia among control, STZ + vehicle and STZ + MSC groups. No difference is found among three groups ( $P = 0.8071, 0.9901, 0.7427$ , respectively). One-way ANOVA. Values are means  $\pm$  s.e.m,  $n = 4$ . Bar = 10  $\mu\text{m}$ . **(b)** Circularity, number of branches and maximum branch length of microglia among control, STZ + vehicle, STZ + exosomes groups. No difference is found among three groups. ( $P = 0.1478, 0.1214, 0.2980$ , respectively). One-way ANOVA. Values are means  $\pm$  s.e.m,  $n = 4$ . Bar = 10  $\mu\text{m}$ .

Supplementary Figure 9

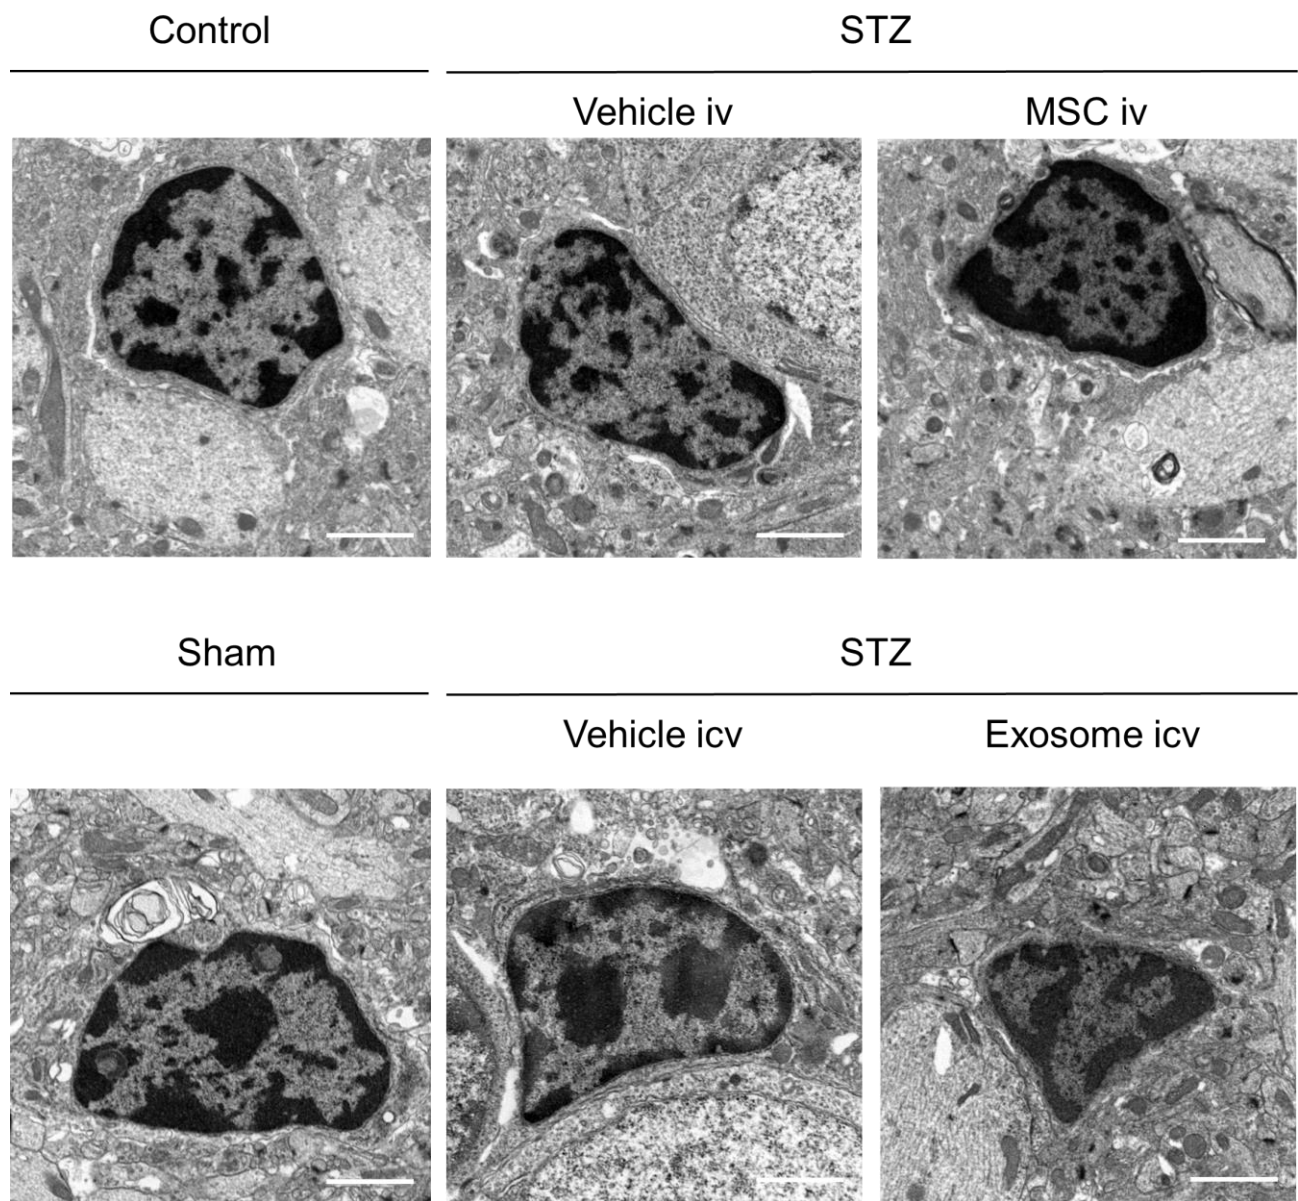

Ultrastructure of microglia. No difference is found in the morphology of microglia among control, STZ + vehicle and STZ + MSC, and also among sham, STZ + vehicle and STZ + exosomes groups.

Bar = 2 $\mu$ m.

Supplementary Figure 10

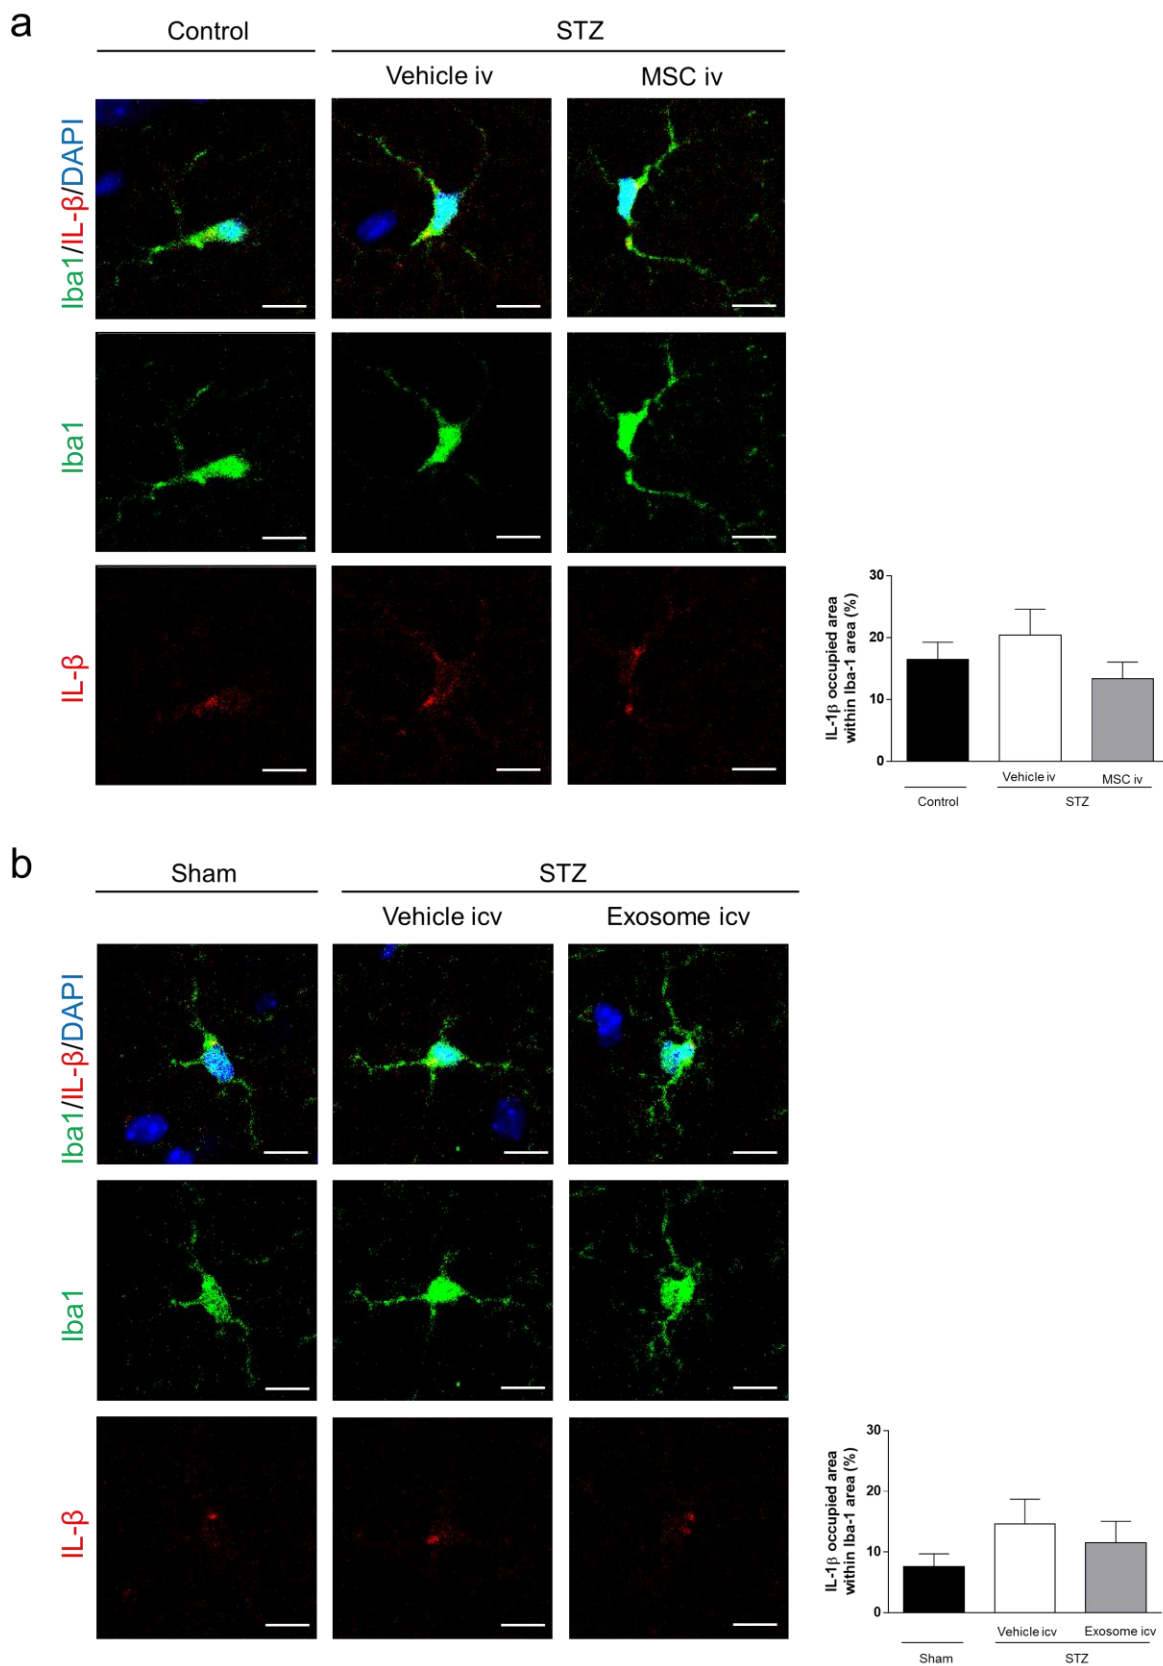

(a) IL-1 $\beta$  occupied area within Iba-1 among control, STZ + vehicle and STZ + MSC groups. No difference is found among three groups. ( $P = 0.3188$ , one-way ANOVA). Values are means  $\pm$  s.e.m, n = 3-4. (b) Area occupied with IL-1 $\beta$  in Iba-1-positive area among sham, STZ + vehicle and STZ + exosomes groups. No difference is found among three groups. ( $P = 0.2964$ , one-way ANOVA). Values are means  $\pm$  s.e.m, n = 4.

## **Supplementary Methods**

### **Intravenous administration of fluorescence-labeled BM-MSCs.**

BM-MSCs were stained with PKH26 (Sigma-Aldrich), according to the manufacturer's protocol. PKH26-labeled BM-MSCs ( $1 \times 10^4$  BM-MSCs/g body weight per animal suspended in 200  $\mu$ l of PBS) were injected intravenously in STZ mice at 12 weeks after STZ injection. At 24 h, 3 days, 7 days, and 14 days after labeled BM-MSCs injections, lung, bone, spleen, and brain were fixed for immunohistochemistry. Frozen sections (20  $\mu$ m) were stained with DAPI (Dojindo) and observed under confocal laser scanning microscopy. The number of PKH-positive cells within 100 randomly selected visual fields at  $20 \times$  magnification was counted in each organ per mouse, and the average was obtained.

### **Intracerebroventricular administration of fluorescence-labeled exosomes.**

Exosomes obtained by multiple steps of ultracentrifugation were stained with PKH26 according to previous reports<sup>1</sup>. PKH-labeled exosomes (5  $\mu$ g in 10  $\mu$ L aCSF) were injected icv in STZ mice at 12 weeks after STZ injection. At 24 h after injection, mice were perfused and fixed, and then the right hemispheres (which was the side injected with exosomes) were cut into frozen sagittal sections (20  $\mu$ m). Sections were incubated with primary antibodies (targeting NeuN, Neurofilament, GFAP, and Iba1), and then FITC-labeled anti-rabbit IgG (Millipore) and FITC-labeled anti-chicken



IgG (Abcam) were used as secondary antibodies. After staining nuclei by DAPI (Dojindo), the sections were observed under confocal laser scanning microscopy (Nikon A1). The number of PKH-positive exosomes merged with NeuN, Neurofilament, GFAP, and Iba1 was counted within 30 randomly selected visual fields in hippocampus fimbria at  $40 \times$  magnification, and the average was obtained.

### **Western blot analysis.**

Proteins in the pellets collected with  $100,000 \times g$  centrifugation and each pellet from the 9 fractions were denatured and separated on 12% SDS-polyacrylamide gels. After transfer onto a PVDF membrane, the membranes were treated with 5% skim milk. The primary antibodies used in this study were CD63 (diluted 1:1,000, System Bioscience, Mountain View, CA, USA) and HSP70 (diluted 1:1,000, System Bioscience); both are common exosome markers. For the secondary antibody, HRP-conjugated goat anti-rabbit IgG (diluted 1:20,000, System Bioscience) was used. The blots were visualized using a West Chemiluminescent Kit (Pierce, Rockford, IL, USA), and the images were detected by Las-3000 (Fujifilm Life Science, Kanagawa, Japan).

### **Exosome observation under electron microscopy.**

Exosomes were observed by negative-stain electron microscopy. Briefly, a  $10 \mu\text{L}$  suspension of isolated exosomes was fixed with 1% glutaraldehyde in PBS, applied to carbon-coated,  $200 \mu\text{m}$

mesh copper grids (Nisshin EM Corporation, Tokyo, Japan), and air dried for 1 h at room temperature. The grids were then stained with 2% uranyl acetate for 30 sec. Images were obtained by an electron microscope (H7650, HITACHI High-Technologies Corporation, Tokyo, Japan) at 80 kV.

### **Skeleton analysis**

The microglial cell circularity and branch length were measured by skeleton analysis using the ImageJ (version 1.49, <http://imagej.nih.gov/ij/>) software, as described previously<sup>2</sup>. Briefly, confocal images were converted to binary images, then analyzed using the AnalyzeSkeleton plugin (<http://fiji.sc/AnalyzeSkeleton>) to obtain the circularity, the number of processes and maximum branch length for each cell.

### **Measurement of insulin and glycated albumin**

Serum insulin levels were assayed using a mouse-specific insulin ELISA kit (Ultrasensitive Mouse Insulin ELISA; Mercodia, Uppsala, Sweden). Measurement of serum glycated albumin was delegated to Monolis, Inc. (Tokyo, Japan).

### **Hanging wire test**

A metallic wire (55 cm length, 2 mm diameter) fixed between two vertical stands was maintained at a height of 35 cm. After the mouse was allowed to grasp the wire, the suspension time

until the animal fell down was measured. The test was performed in 3 trials per mouse, and each trial had a time limit of 180 sec. In experiments, the maximum hanging time was used as Hanging time (sec), and the Holding Impulse [(s\*g) = Body mass (grams) x Hanging Time (sec)] was calculated to diminish the effect of body weight.

## References

- 1 Yuyama, K. *et al.* Decreased amyloid-beta pathologies by intracerebral loading of glycosphingolipid-enriched exosomes in Alzheimer model mice. *J Biol Chem* **289**, 24488-24498 (2014).
- 2 Madeira, M. H. *et al.* Adenosine A2AR blockade prevents neuroinflammation-induced death of retinal ganglion cells caused by elevated pressure. *J Neuroinflammation* **12**, 115 (2015).
